# Supplementary figures and images for: Analysis of the Conjunctival Microbiome in Patients with Atopic Keratoconjunctivitis and Healthy Individuals
Source: PubMed Central journal article supplement — Ann Dermatol. 2021 Mar 8;33(2):163–9. doi: 10.5021/ad.2021.33.2.163 (PMC8082000; doi:10.5021/ad.2021.33.2.163), 2021-03-08

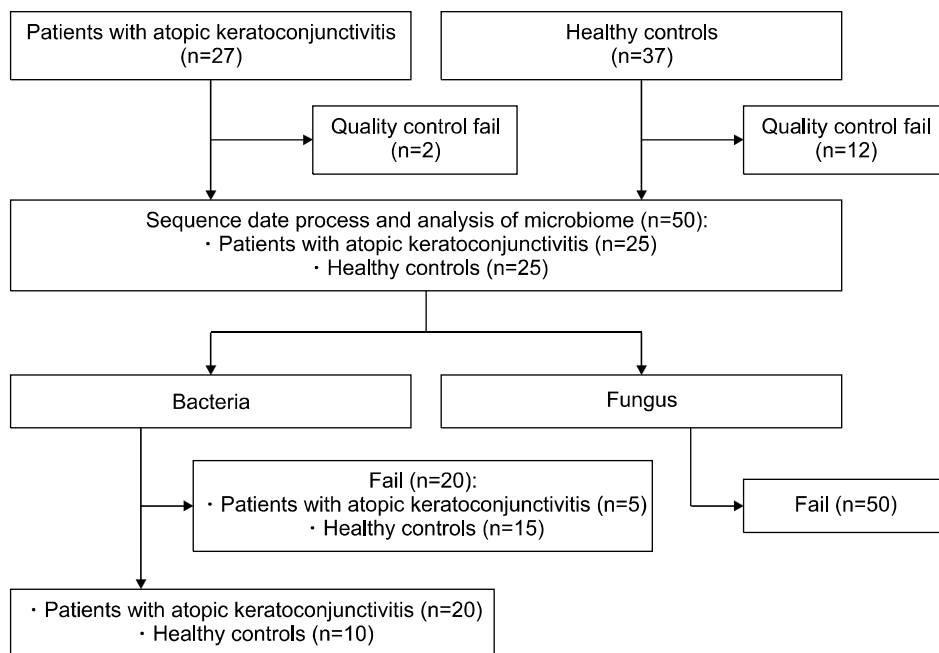

**Supplementary Fig. 1.** Flow chart of the study process.

Supplement: ad-33-163-s001.pdf [file ad-33-163-s001.pdf]
